# Supplementary material
Source: PubMed Central journal article supplement (PMC8464221)
Supplement: jjab031_suppl_supplementary_material.pdf [file jjab031_suppl_supplementary_material.pdf]

1 **Restored macrophage function ameliorates disease pathophysiology in inflammatory**  
2 **bowel disease**

3

4 M Ackermann<sup>1,2</sup>, A Mucci<sup>1,3</sup>, A McCabe<sup>3</sup>, S Frei<sup>4</sup>, K Wright<sup>1</sup>, SB Snapper<sup>4,6</sup>, N Lachmann<sup>2</sup>, DA  
5 Williams<sup>1,3,5,6</sup>, C Brendel<sup>1,3,5,6</sup>

6

7 <sup>1</sup> Pediatric Oncology, Dana-Farber Cancer Center, Boston, MA, USA JRG Translational

8 <sup>2</sup> Translational Hematology of Congenital Diseases, Institute of Experimental Hematology,  
9 Hannover Medical School, Hannover, Germany

10 <sup>3</sup> Division of Hematology/Oncology, Boston Children's Hospital, MA, USA

11 <sup>4</sup> Division of Gastroenterology, Hepatology and Nutrition, Boston Children's Hospital, Boston,  
12 USA

13 <sup>5</sup> Harvard Stem Cell Institute, Cambridge, MA, USA

14 <sup>6</sup> Harvard Medical School, Boston, MA, USA

15

16 **Supplementary Information**

17

18

19

20

21

22

23

24

25

26

27

28

1 **Supplementary Figures:**

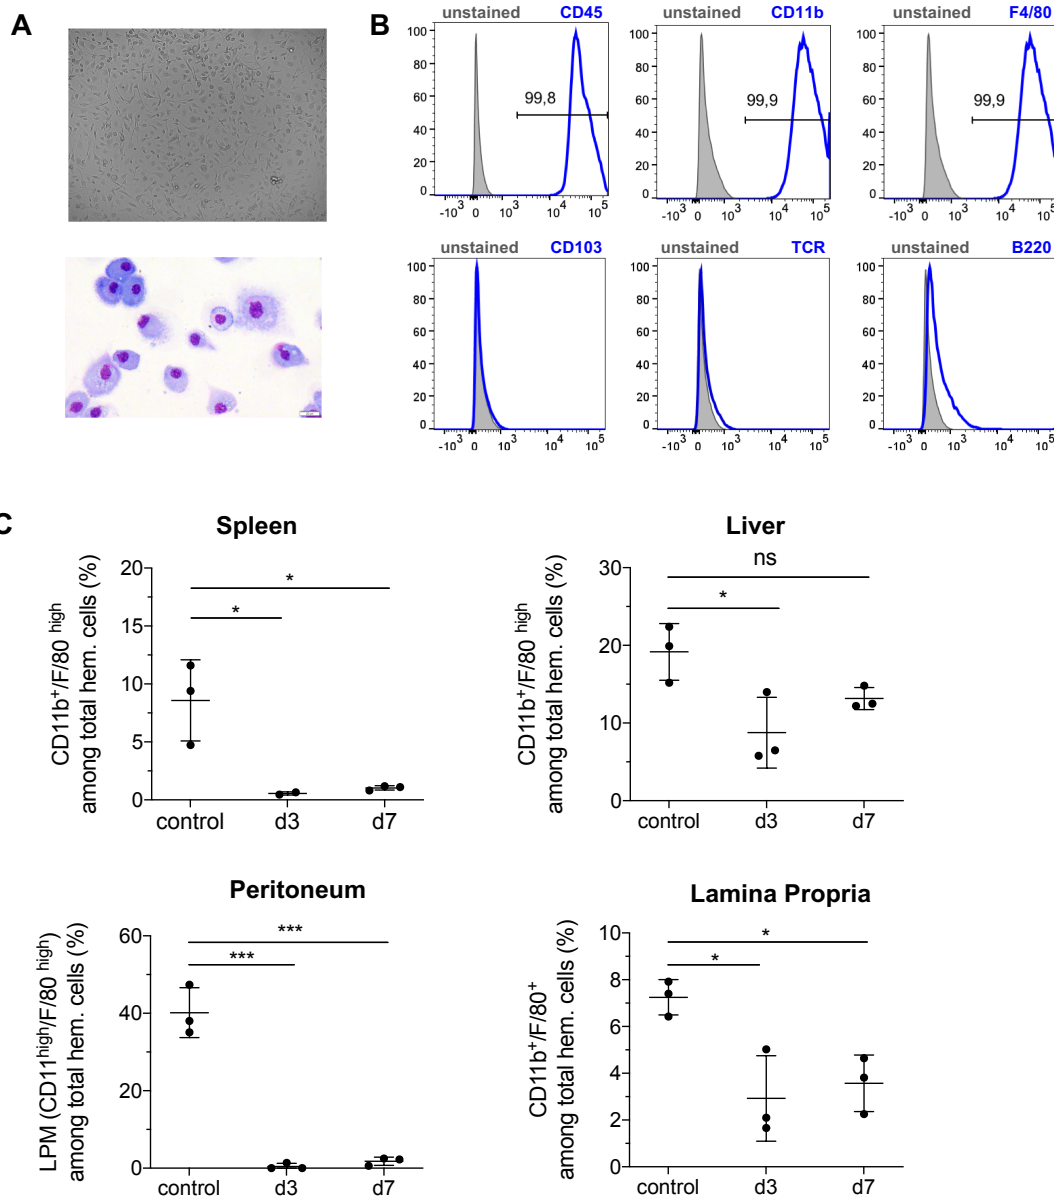

2

3 **Supplementary Figure 1: Ex vivo generation of macrophages and in vivo depletion of**

4 **macrophages with clodronate.** Total bone marrow, lineage positive or lineage negative cells

5 were differentiated for 7-10 days in medium containing M-CSF. **(A)** Brightfield microscopy and

6 H/E stained cytopins of bone marrow derived macrophages (BMDMs) generated *in vitro*. **(B)**

7 Flow cytometric analyses of *in vitro* generated BMDMs. Grey filled: unstained control, Blue

8 line: respective surface marker. **(C)** Macrophage populations in spleen, liver, peritoneum und

9 lamina propria (LP) were analyzed by flow cytometry 3 and 7 days post i.p. injection of

10 clodronate liposomes in *Il10rb<sup>-/-</sup>* mice. Non-treated animals served as controls (n=3

11 animals/group, mean±SD).

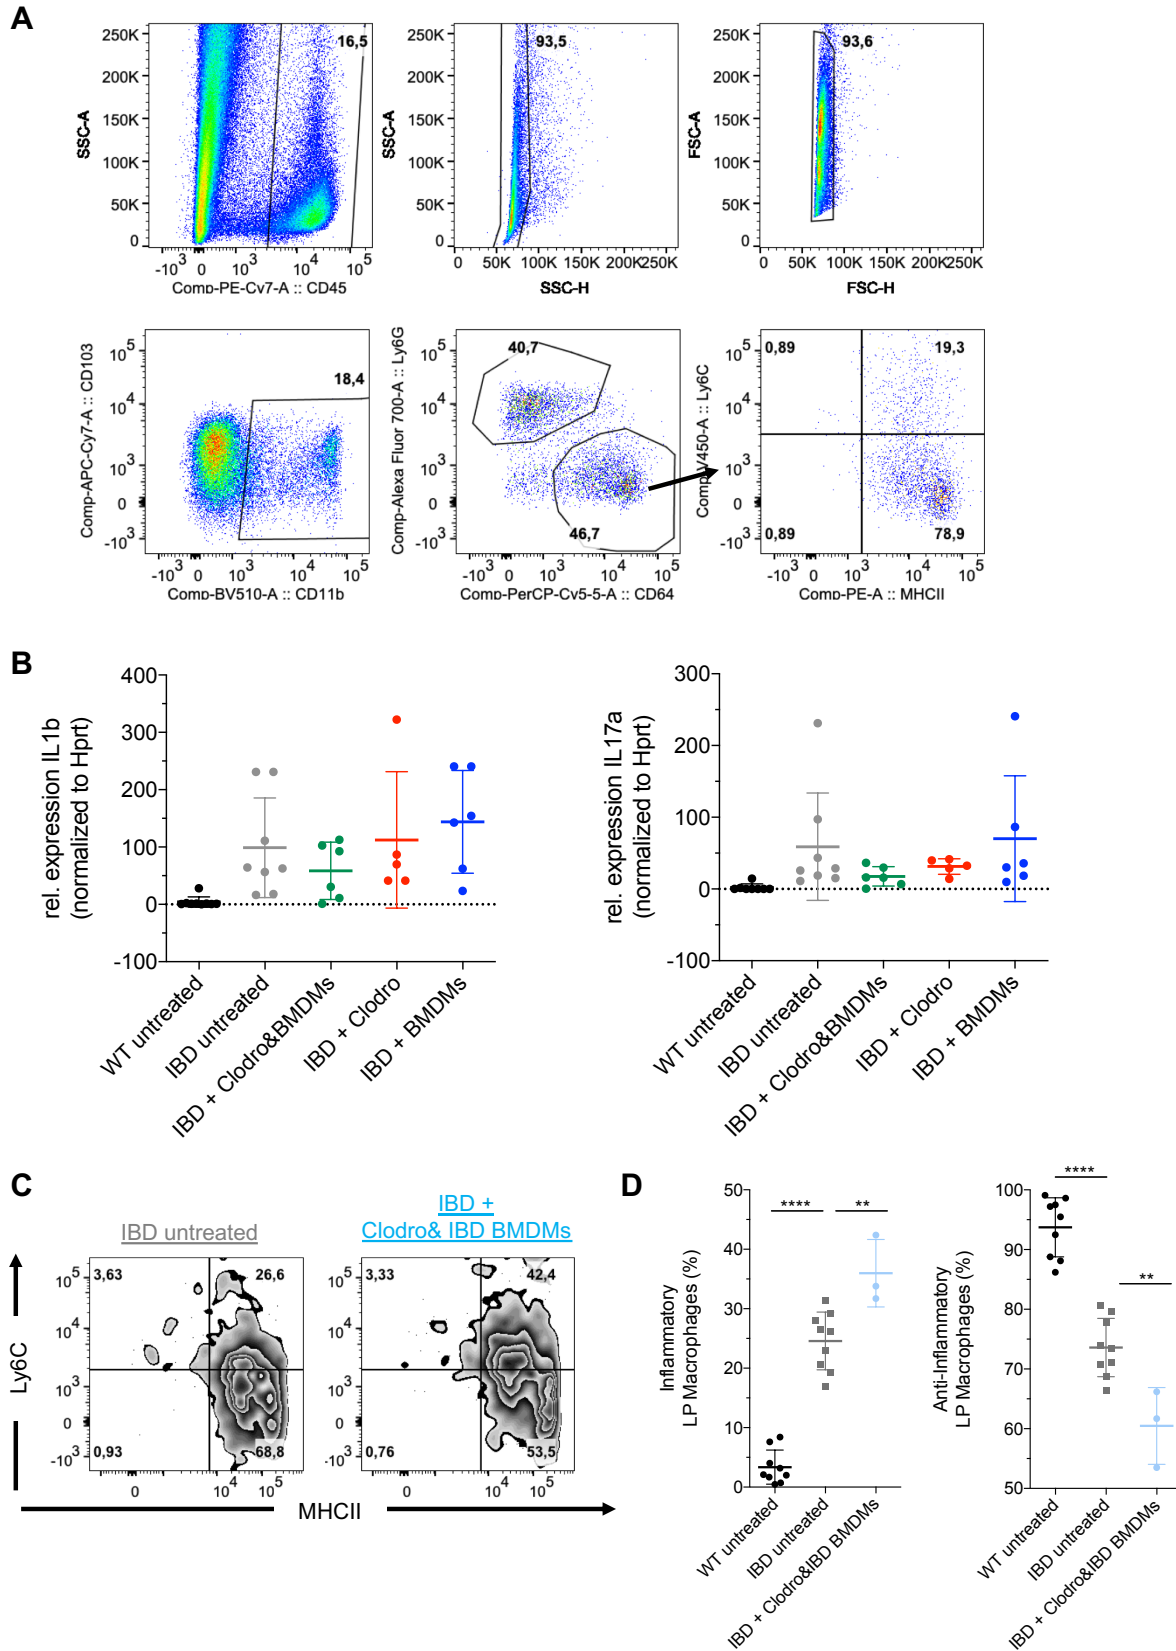

1

2 **Supplementary Figure 2: Therapeutic effect of a macrophage-based therapy on colitis**  
 3 **in *Il10rb*<sup>-/-</sup> mice. (A)** Representative gating strategy for the analysis of lamina propria  
 4 macrophages and granulocytes by flow cytometry. Pre-gating on total CD45<sup>+</sup> hematopoietic

1 cells was followed by two single-cell gating steps. Myeloid, non-dendritic cell populations were  
2 defined as CD11b<sup>+</sup>/CD103<sup>-</sup> cells. Subsequently, granulocytes and monocyte/macrophages  
3 were separated by expression of Ly6G and CD64 as CD45<sup>+</sup>/CD11b<sup>+</sup>/CD103<sup>-</sup>/Ly6G<sup>+</sup>/CD64<sup>-</sup>  
4 granulocytes and CD45<sup>+</sup>/CD11b<sup>+</sup>/CD103<sup>-</sup>/Ly6G<sup>-</sup>/CD64<sup>+</sup> monocyte/macrophages. Pro- and  
5 anti-inflammatory macrophages were identified by analyzing expression of Ly6C and MHCII.  
6 **(B)** Relative expression of IL1 $\beta$  (left) and IL17 $\alpha$  (right) in total lamina propria (LP) cell extracts  
7 analyzed by qRT-PCR (data represent three independent experiments, individual values with  
8 mean $\pm$ SD, n=5-8). **(C)** Representative flow cytometry plots showing the frequency of  
9 Ly6C<sup>+</sup>/MHCII<sup>+</sup> inflammatory and Ly6C<sup>-</sup>/MHCII<sup>+</sup> anti-inflammatory LP monocyte/macrophages  
10 in IBD animals treated with clodronate liposomes and IBD macrophages as well as untreated  
11 animals. **(D)** Quantification of n=3 animals. (individual values with mean $\pm$ SD, n=3-9).  
12 (Significances calculated by one-way ANOVA with Dunnett's multiple comparison test,  
13 \*p<0.05, \*\*p<0.01, \*\*\*p<0.001, \*\*\*\*<0.0001, ns not significant)

14

15

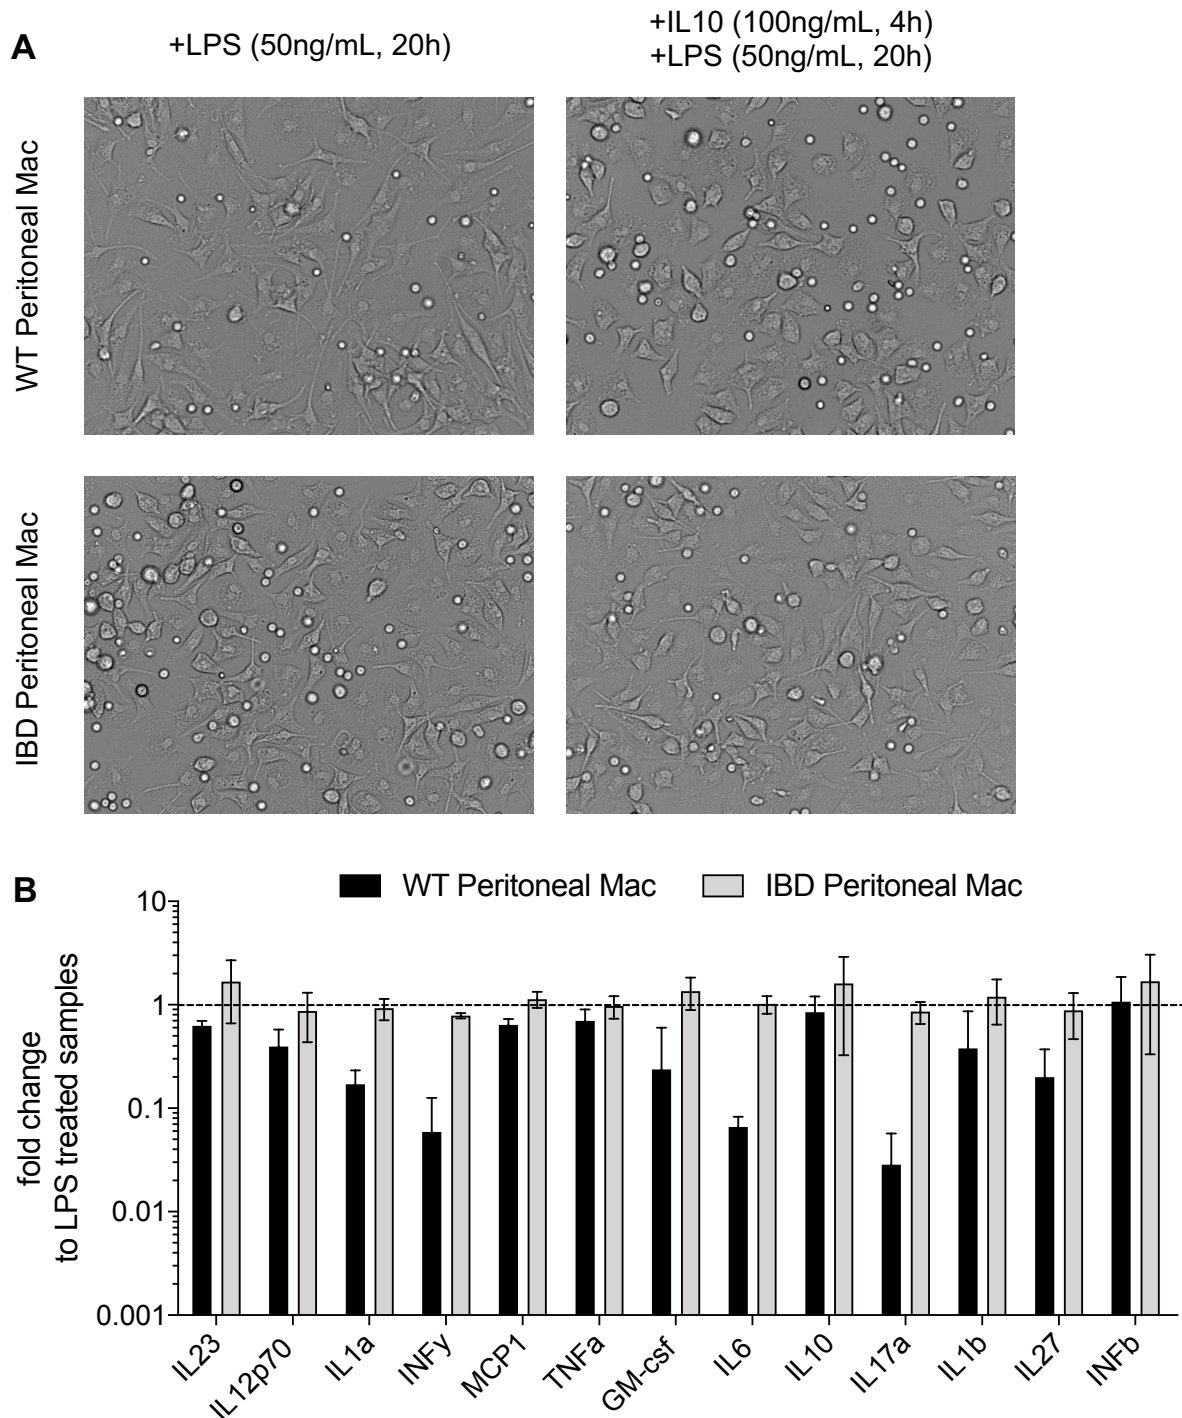

1

2 **Supplementary Figure 3: Functional consequences of IL10Rb deficiency in peritoneal**

3 **macrophages. (A)** Brightfield microscopy of WT and *Il10rb*<sup>-/-</sup> IBD macrophages derived from

4 the peritoneal lavage fluid after stimulation with LPS alone or LPS in combination with IL10.

5 **(B)** Legendplex-based cytokine secretion analysis of WT and *Il10rb*<sup>-/-</sup> IBD peritoneal cavity

6 derived macrophages after 24 hours of stimulation. Values are given as fold change for IL10

7 and LPS vs. LPS only treated samples (n=3, mean $\pm$ SD, dashed line represents 1).

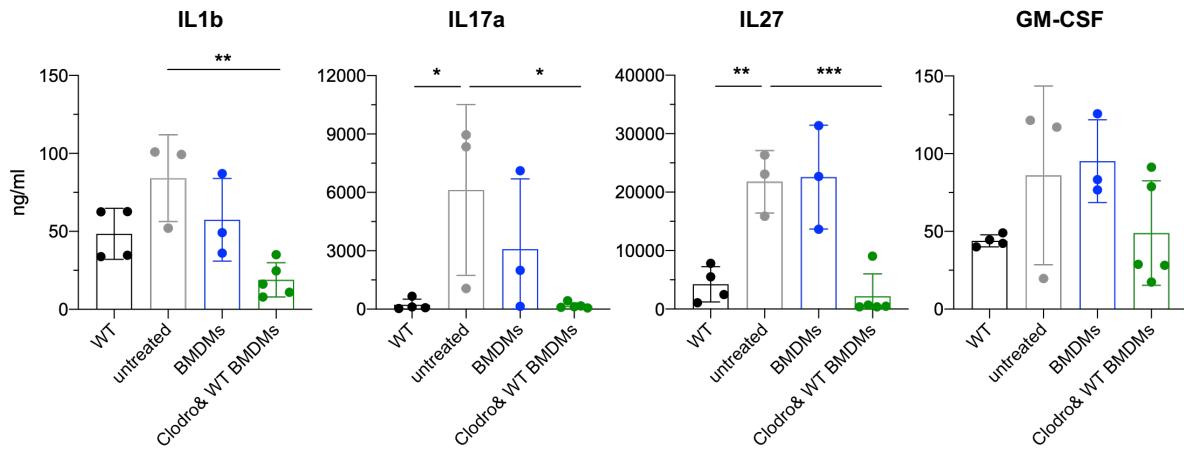

1

2 **Supplementary Figure 4: Cytokine profiling in the B16 *Il10rb<sup>-/-</sup>* model.** Secretion of IL1 $\beta$ ,  
 3 IL17 $\alpha$ , IL27 and GM-CSF by macrophages derived from the peritoneal lavage fluid of different  
 4 experimental groups (WT untreated, B16 *Il10rb<sup>-/-</sup>* IBD untreated, IBD+BMDMs and  
 5 IBD+Clodro/BMDMs) after LPS stimulation (Data represent one experiment, individual values  
 6 with mean $\pm$ SD, n=4-5 per group, cells isolated 6 days post transplantation). Significances are  
 7 calculated by one-way ANOVA with Dunnett's multiple comparison test, \*p<0.05, \*\*p<0.01,  
 8 \*\*\*p<0.001, \*\*\*\*<0.0001, ns not significant.

9

10

11

12

13

14

15

16

17

18

19

20

21

22

1 **Supplementary Methods:**

2

3 Mice: *Il10rb*<sup>-/-</sup> (*Il10rb*<sup>tm1Agt</sup>) (RRID: MGI:3603437) 129SvEv mice, **B6.129S2-*Il10rb*<sup>tm1Agt</sup>/J** and  
4 **their matched controls** were housed in a specific pathogen-free animal facility at Boston  
5 Children's Hospital. Mice had access to food and water ad libitum. Both male and female mice  
6 were used throughout this study. The animals were 3-5 month of age at the beginning of  
7 treatment. All experimental groups were randomly allocated to co-housed littermates. All  
8 experiments were conducted following approval from the Animal Resources at Children's  
9 Hospital following the guidelines of the Institutional Animal Care and Use Committees (IACUC  
10 protocols 17-05-3410R and 17-01-3364R).

11

12 Isolation of BM& lineage depletion: Iliac crest, femur and tibiae were isolated from euthanized  
13 animals and bone marrow isolated by flushing the bones with a syringe or crushing the bones  
14 with mortar and pestle. Isolated total bone marrow cells were either used directly for  
15 differentiation or subjected to lineage depletion using a MACS-based sorting strategy by using  
16 a lineage cell depletion kit (Miltenyi Biotec, Bergisch Gladbach, Germany) following the  
17 manufacturer's instructions and subsequently differentiated to macrophages.

18

19 Generation and preparation of lentiviral vectors

20 The 3<sup>rd</sup> generation lentiviral vector PGK-*mIL10rb* (pCCL-hPGK-*coll10rb*-T2A-mVenus-wPRE)  
21 was generated by replacing GFP in the pCCL-PGK-GFP-WPRE with a codon optimized  
22 (GeneArt, Invitrogen, Carlsbad, USA) variant of the murine *Il10rb* cDNA-T2A-mVenus  
23 fragment via BamH1 – Sal1 restriction cut sites.<sup>1</sup> Vector production was performed by transient  
24 transfection of HEK293T cells following standard procedures.<sup>2</sup>

25

26 Transduction of lineage negative cells

27 Lineage negative bone marrow cells were prestimulated at 0.5-1\*10<sup>6</sup> cells/ml for 24h in  
28 CellGro SCGM media supplemented with mSCF, hTPO and hFLT-3L (each 100ng/ml,

1 Peprotech, Rocky Hill, NJ, USA). Viral supernatants, titered previously under identical  
2 conditions on lineage negative cells, were added at a multiplicity of infection (MOI) of 1-2  
3 overnight.

4

#### 5 STAT3 phosphorylation:

6 Cells were stimulated for 20min with 50ng/ml IL10, then fixed for 10min at 37C (BD Cytifix  
7 #554655). After washing the cells were permeabilized using ice cold Methanol buffer (BD  
8 PermBuffer III #558050) and stained for 45min with anti P-STAT3 antibody (pY705,  
9 BD #612569).

10

#### 11 Hematopoietic stem cell transplantation

12 *Il10rb*<sup>-/-</sup> 129SvEv mice were irradiated using a 7Gy+4.5Gy split dose gamma irradiation  
13 spaced 24h apart. Transduced lineage negative cells were washed twice in PBS and  
14 administered via retroorbital injection. Mice received Baytril™ supplemented drinking water  
15 (1.9ml/250ml) for two weeks post irradiation.

16

17 Macrophage Differentiation: Total bone marrow, lineage negative or lineage positive cells were  
18 differentiated into macrophages by 7-9 days of cultivation in DMEM medium supplemented  
19 with 10% FCS, 1 mM penicillin/streptomycin, and 30% macrophage colony-stimulating factor  
20 (M-CSF) conditioned supernatant produced by L929 cells as described previously.<sup>3</sup> Cells were  
21 cultured on non-tissue culture treated plate and non-adherent cells were removed by media  
22 change after 3-4 days.

23

24 Treatment with Clodronate Liposomes: Clodronate liposomes were purchased from Liposoma  
25 (Amsterdam, The Netherlands) and 100-200ul (approx. 50 mg/kg body weight) were injected  
26 intraperitoneally (i.p.) to the animals under isoflurane anesthesia.

27



1 Transplantation of BMDMs: Bone marrow derived macrophages (BMDMs) were resuspended  
2 in PBS and  $4-12 \times 10^6$  cells in 200ul volume were injected i.p. to the animals under isoflurane  
3 anesthesia.

4

5 Isolation of lamina propria cells:

6 Lamina propria immune cells were prepared as we reported recently.<sup>4</sup> Briefly, colons were cut  
7 in pieces and stripped of epithelial cells by performing agitation in 10 mM EDTA containing  
8 buffer for 40 min at 37°C. Subsequently, tissues were further minced with a scalpel and  
9 digested using collagenase VIII (Sigma-Aldrich, St. Louis, MI, USA) for 30–45 min at 37°C.  
10 Single cell suspensions were filtered and stained for flow cytometry.

11

12 Cytospins: Cytospins were generated utilizing a Shandon cyto centrifuge (Thermo Scientific,  
13 Waltham, MA, USA). Slides were stained for 5 min in May-Grünwald stain and 10 min in 5%  
14 of Giemsa Azur-Eosin-Methyleneblue solution and washed extensively in aqua dest.

15

16 Histology and scoring: Colon sections were fixed in 4% PFA overnight. Paraffin embedding  
17 and H/E staining were performed at the Beth-Israel Diaconess Medical Center Histology Core  
18 following standard procedures. Blinded scoring was performed following adapted guidelines  
19 from Erben et. al..<sup>5</sup> In brief parameters for colitis were: Inflammatory infiltrates (severity 0-4  
20 and extent 0-3), Hyperplasia (0-4), Goblet cell loss (0-4) and Erosion (0-4), (1: minimal; 2: mild;  
21 3: moderate; 4: severe.

22

23 Flow cytometry: PBS supplemented with 2 mM EDTA and 5% FCS (FACS buffer) was used  
24 during the staining process. Fc blocking reagent was used to prevent unspecific binding. Cells  
25 were rinsed with FACS buffer, analyzed on a LSRII machine (BD, Franklin Lakes, NJ, USA)  
26 and raw data were analyzed using FlowJo software (TreeStar, Ashland, OR, USA). Used  
27 antibodies:

28

| Antigen | Fluorochrome   | Catalog number | Provider       |
|---------|----------------|----------------|----------------|
| CD45    | PE -Cy7        | 103113         | Biolegend      |
| CD103   | APC-Cy7        | 121431         | Biolegend      |
| CD11b   | BV510          | 101245         | Biolegend      |
| CD11b   | PE             | 101207         | Biolegend      |
| Ly6G    | AlexaFluor700  | 127622         | Biolegend      |
| CD64    | PerCp-Cy5.5    | 139308         | Biolegend      |
| Ly6C    | eFluor 450     | 48-5932-82     | Invitrogen     |
| MHCII   | PE             | 107607         | Biolegend      |
| B220    | Pacific Blue   | 558108         | BD Pharmingen  |
| B220    | AlexaFluor 488 | 103228         | Biolegend      |
| CD3     | APC            | 17-0032-80     | Invitrogen     |
| TCRb    | eFluor 450     | 109207         | Biolegend      |
| Gr1     | PE             | 108407         | Biolegend      |
| Gr1     | APC-Cy7        | 552985         | BD Biosciences |
| CD45    | FITC           | 103107         | Biolegend      |
| CD45.1  | PE-Cy7         | 4334853        | Invitrogen     |

1

2

3 RNA Isolation and qRT-PCR: Total RNA was extracted from whole colonic tissue using  
4 TRizol® Reagent (Ambion® by life technologies, Carlsbad, CA, USA) according to  
5 manufacturer's instructions. Complementary DNA (cDNA) was generated from 1-2 µg RNA  
6 using iScript™ Select cDNA Synthesis Kit (Bio-Rad Laboratories, Hercules, CA, USA).  
7 Transcript analysis was performed using SsoAdvanced™ Universal SYBR® Green Supermixes  
8 on a CFX96 Real-Time System (Bio-Rad). The following primers were used: *I17a-2F* 5' GGC  
9 CCT CAG ACT ACC TCA AC 3', *I17a-2R* 5' TCT CGA CCC TGA AAG TGA AGG 3';

1 *I11b*-F 5' GCA ACT GTT CCT GAA CTC AAC 3', *I11b*-R 5' ATC TTT TGG GGT CCG TCA ACT  
2 3'; *Hprt*-F 5' GTT GGA TAC AGG CCA GAC TTT GTT G 3', *Hprt*-R 5' GAG GGT AGG CTG  
3 GCC TAT AGG CT 3'. Gene expression was normalized against hypoxanthine-guanine  
4 phosphoribosyl transferase (*Hprt*). Relative expression was quantified using the  $2^{-\Delta Ct}$  method.  
5 PCR: The *I110rb* and *Gtcd1* genes were amplified from gDNA using Promega GoTaq  
6 Polymerase (Cat# M3005) using the following conditions: 95C 2:00min, (95C 30s, 60C 30s,  
7 70C 60s) x35, 72C 5min. Primer sequences: *I110rb*-F 5' GGAGACAAGACTTTGGAGGGG 3',  
8 *I110rb*-R 5' CACCTGGCACCAGAAGGAAG 3'. *Gtcd1*-F 5'  
9 GAAGTTCAGGTTAATTAGCTGCTG 3', *Gtcd1*-R 5' GGCACCTTAACATTTGGTTCTG 3'.

10

11 Legendplex: For analysis of cytokine secretion macrophages were starved in X-VIVO 15  
12 medium (Lonza, Basel, Switzerland) over night and stimulated with 50ng/ml LPS (sigma) and  
13 100ng/ml IL10 (Peprotec, Hamburg, Germany) for 24 hours. Supernatants were analyzed  
14 using the Legendplex Mouse Inflammation Panel (13-Plex, Biolegend, San Diego, CA, USA)  
15 following the manufacturer's instructions.

16

17 Statistics:

18 GraphPad Prism 7 or 8 Software (San Diego, CA, USA) were applied to perform analysis of  
19 variance (ANOVA). Asterisks indicated: \* P< .05; \*\* P< .01; \*\*\*P< .001

20

21

22

23

24

25

26

27

28

1 **Supplementary References:**

- 2 1 Dull, T., Zufferey, R., Kelly, M., Mandel, R. J., Nguyen, M., Trono, D. & Naldini, L. A  
3 third-generation lentivirus vector with a conditional packaging system. *J Virol* **72**,  
4 8463-8471 (1998).
- 5 2 Brendel, C., Goebel, B., Daniela, A., Brugman, M., Kneissl, S., Schwable, J., Kaufmann,  
6 K. B., Muller-Kuller, U., Kunkel, H., Chen-Wichmann, L., Abel, T., Serve, H., Bystrykh,  
7 L., Buchholz, C. J. & Grez, M. CD133-targeted gene transfer into long-term  
8 repopulating hematopoietic stem cells. *Mol Ther* **23**, 63-70, doi:10.1038/mt.2014.173  
9 S1525-0016(16)30011-9 [pii] (2015).
- 10 3 Mucci, A., Kunkiel, J., Suzuki, T., Brenning, S., Glage, S., Kuhnel, M. P., Ackermann, M.,  
11 Happle, C., Kuhn, A., Schambach, A., Trapnell, B. C., Hansen, G., Moritz, T. &  
12 Lachmann, N. Murine iPSC-Derived Macrophages as a Tool for Disease Modeling of  
13 Hereditary Pulmonary Alveolar Proteinosis due to Csf2rb Deficiency. *Stem cell reports*  
14 **7**, 292-305, doi:10.1016/j.stemcr.2016.06.011 (2016).
- 15 4 Shouval, D. S., Biswas, A., Goettel, J. A., McCann, K., Conaway, E., Redhu, N. S.,  
16 Mascanfroni, I. D., Al Adham, Z., Lavoie, S., Ibourk, M., Nguyen, D. D., Samsom, J. N.,  
17 Escher, J. C., Somech, R., Weiss, B., Beier, R., Conklin, L. S., Ebens, C. L., Santos, F. G.,  
18 Ferreira, A. R., Sherlock, M., Bhan, A. K., Muller, W., Mora, J. R., Quintana, F. J., Klein,  
19 C., Muise, A. M., Horwitz, B. H. & Snapper, S. B. Interleukin-10 receptor signaling in  
20 innate immune cells regulates mucosal immune tolerance and anti-inflammatory  
21 macrophage function. *Immunity* **40**, 706-719, doi:10.1016/j.immuni.2014.03.011  
22 (2014).
- 23 5 Erben, U., Loddenkemper, C., Doerfel, K., Spieckermann, S., Haller, D., Heimesaat, M.  
24 M., Zeitz, M., Siegmund, B. & Kühl, A. A. A guide to histomorphological evaluation of  
25 intestinal inflammation in mouse models. *Int J Clin Exp Pathol* **7**, 4557-4576 (2014).
